# Supplementary material
Source: PubMed Central journal article supplement (PMC4378420)
Supplement: pnas.201417566SI.pdf [file pnas.201417566SI.pdf]

# Supporting Information

Lewis et al. 10.1073/pnas.1417566112

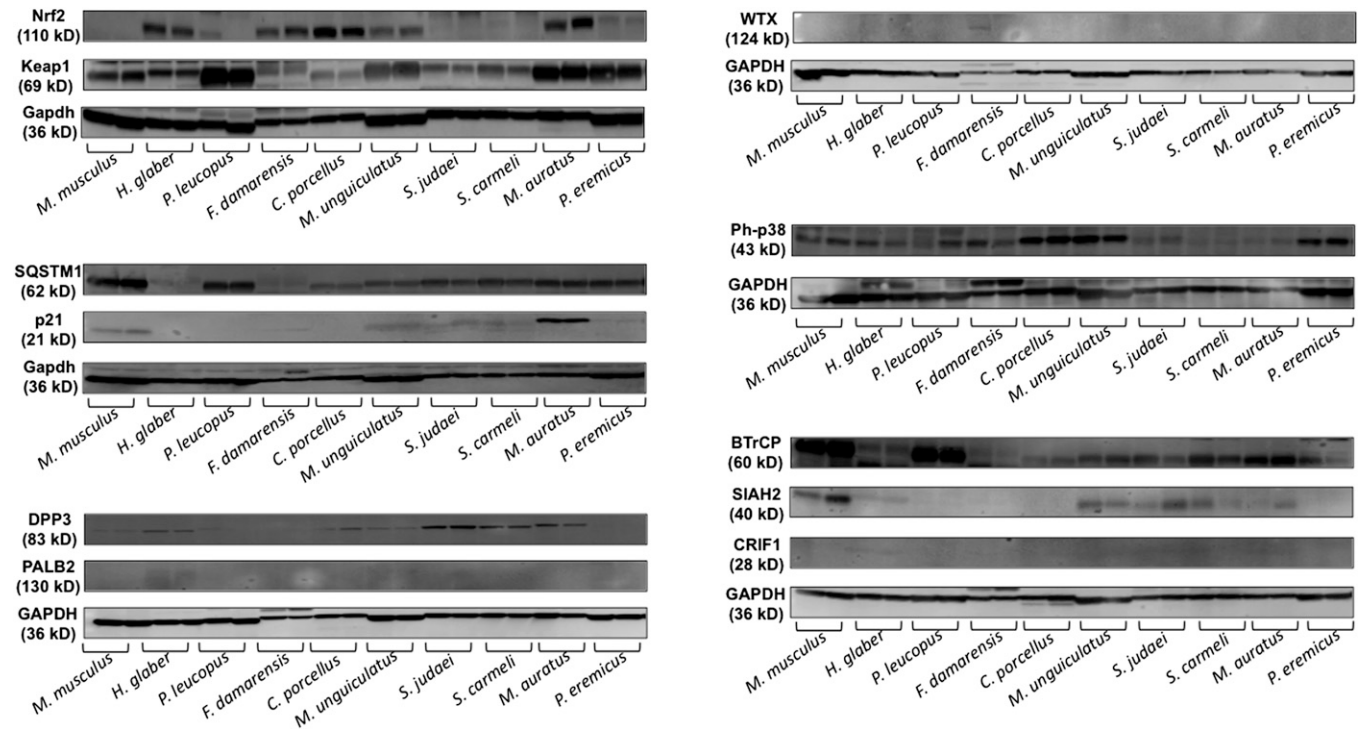

**Fig. S1.** Proteins measured by Immunoblot in rodent species with varying MLSPs. We analyzed 11 different proteins, including Nrf2, Keap1, SQSTM1/p62, p21, DPP3, PALB2, WTX, Phospho-p38,  $\beta$ TrCP, SIAH2, and CRIF1, all of which have been shown to influence Nrf2-signaling activity, in 10 different rodent species via Immunoblotting ( $n = 4$  per species). Blots presented here are representative of all Immunoblotting performed. All proteins were normalized to GAPDH, and sizes of the bands quantified for each protein are found next to each blot. Significant correlations with MLSP were observed between Keap1, SQSTM1/p62, and  $\beta$ TrCP.

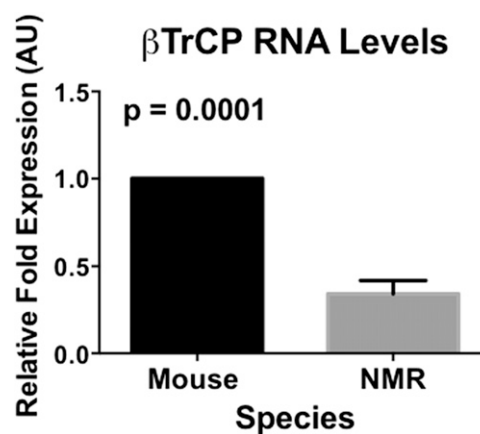

**Fig. S2.**  $\beta$ TrCP mRNA levels are significantly lower in naked mole-rats compared with mice. PCR revealed that mRNA levels of  $\beta$ TrCP were significantly lower ( $P = 0.0001$ ) in long-lived naked mole-rats compared with mice. These results further support lower protein levels of  $\beta$ TrCP, potentially enhancing constitutive Nrf2 signaling in long-lived rodents.
